# Supplementary material for: Impact of premorbid hypertension and renin-angiotensin-aldosterone system inhibitors on the severity of aneurysmal subarachnoid haemorrhage: a multicentre study
Source: HighWire-hosted journal article supplement (doi:10.1136/svn-2023-003052), 2024-06-17
Supplement: svn-2023-003052supp001_data_supplement.pdf [file svn-2023-003052supp001_data_supplement.pdf]

---

## Supplementary material

### Impact of premorbid hypertension and antihypertensive medications on the severity of aneurysmal subarachnoid hemorrhage: a multicenter study

#### Table of Contents

|                                                                                                             |   |
|-------------------------------------------------------------------------------------------------------------|---|
| <b>Section S1: STROBE checklist</b> .....                                                                   | 2 |
| <b>Section S2: Inclusion and exclusion criteria of study population</b> .....                               | 5 |
| <b>Section S3: Two clinical grading scales for the severity of aneurysmal subarachnoid hemorrhage</b> ..... | 6 |
| <b>Section S4: Statistical analysis</b>                                                                     |   |
| S4.1: Sample size considerations.....                                                                       | 7 |
| S4.2: Multiple imputation for missing data.....                                                             | 7 |
| <b>Section S5: Tables</b> .....                                                                             | 9 |

### Section S1: STROBE checklist

The presentation was following The Strengthening the Reporting of Observational Studies in Epidemiology (STROBE) statement, and the checklist was provided below.

|                              | Item No. | Recommendation                                                                                                                                                                       | Page No. |
|------------------------------|----------|--------------------------------------------------------------------------------------------------------------------------------------------------------------------------------------|----------|
| <b>Title and abstract</b>    | 1        | (a) Indicate the study's design with a commonly used term in the title or the abstract                                                                                               | 1        |
|                              |          | (b) Provide in the abstract an informative and balanced summary of what was done and what was found                                                                                  | 1-2      |
| <b>Introduction</b>          |          |                                                                                                                                                                                      |          |
| Background/rationale         | 2        | Explain the scientific background and rationale for the investigation being reported                                                                                                 | 3-5      |
| Objectives                   | 3        | State specific objectives, including any prespecified hypotheses                                                                                                                     | 4        |
| <b>Methods</b>               |          |                                                                                                                                                                                      |          |
| Study design                 | 4        | Present key elements of study design early in the paper                                                                                                                              | 5        |
| Setting                      | 5        | Describe the setting, locations, and relevant dates, including periods of recruitment, exposure, follow-up, and data collection                                                      | 5        |
| Participants                 | 6        | (a) Give the eligibility criteria, and the sources and methods of selection of participants. Describe methods of follow-up                                                           | 5-6      |
|                              |          | (b) For matched studies, give matching criteria and number of exposed and unexposed                                                                                                  | NA       |
| Variables                    | 7        | Clearly define all outcomes, exposures, predictors, potential confounders, and effect modifiers. Give diagnostic criteria, if applicable                                             | 6        |
| Data sources/<br>measurement | 8*       | For each variable of interest, give sources of data and details of methods of assessment (measurement). Describe comparability of assessment methods if there is more than one group | 6-7      |
| Bias                         | 9        | Describe any efforts to address potential sources of bias                                                                                                                            | 6-10     |
| Study size                   | 10       | Explain how the study size was arrived at                                                                                                                                            | S4.1     |
| Quantitative variables       | 11       | Explain how quantitative variables were handled in the analyses. If applicable, describe which groupings were chosen and why                                                         | 8        |
| Statistical methods          | 12       | (a) Describe all statistical methods, including those used to control for confounding                                                                                                | 8-11; S4 |

|                   |     |                                                                                                                                                                                                              |                         |
|-------------------|-----|--------------------------------------------------------------------------------------------------------------------------------------------------------------------------------------------------------------|-------------------------|
|                   |     | (b) Describe any methods used to examine subgroups and interactions                                                                                                                                          | 10                      |
|                   |     | (c) Explain how missing data were addressed                                                                                                                                                                  | 8;<br>S4.2              |
|                   |     | (d) If applicable, explain how loss to follow-up was addressed                                                                                                                                               | NA                      |
|                   |     | (e) Describe any sensitivity analyses                                                                                                                                                                        | 10                      |
| <b>Results</b>    |     |                                                                                                                                                                                                              |                         |
| Participants      | 13* | (a) Report numbers of individuals at each stage of study—eg numbers potentially eligible, examined for eligibility, confirmed eligible, included in the study, completing follow-up, and analysed            | Figure 1                |
|                   |     | (b) Give reasons for non-participation at each stage                                                                                                                                                         | Figure 1                |
|                   |     | (c) Consider use of a flow diagram                                                                                                                                                                           | Figure 1                |
| Descriptive data  | 14* | (a) Give characteristics of study participants (eg demographic, clinical, social) and information on exposures and potential confounders                                                                     | 10                      |
|                   |     | (b) Indicate number of participants with missing data for each variable of interest                                                                                                                          | Table 1                 |
|                   |     | (c) Summarise follow-up time (eg, average and total amount)                                                                                                                                                  | NA                      |
| Outcome data      | 15* | Report numbers of outcome events or summary measures over time                                                                                                                                               | 11                      |
| Main results      | 16  | (a) Give unadjusted estimates and, if applicable, confounder-adjusted estimates and their precision (eg, 95% confidence interval). Make clear which confounders were adjusted for and why they were included | 11; Table 2             |
|                   |     | (b) Report category boundaries when continuous variables were categorized                                                                                                                                    | NA                      |
|                   |     | (c) If relevant, consider translating estimates of relative risk into absolute risk for a meaningful time period                                                                                             | NA                      |
| Other analyses    | 17  | Report other analyses done—eg analyses of subgroups and interactions, and sensitivity analyses                                                                                                               | 9-11; Table 2, Figure 2 |
| <b>Discussion</b> |     |                                                                                                                                                                                                              |                         |
| Key results       | 18  | Summarise key results with reference to study objectives                                                                                                                                                     | 12                      |
| Limitations       | 19  | Discuss limitations of the study, taking into account sources of potential bias or imprecision. Discuss both direction and magnitude of any potential bias                                                   | 17                      |
| Interpretation    | 20  | Give a cautious overall interpretation of results considering objectives, limitations, multiplicity of                                                                                                       | 12-16                   |

---

|                          |    |                                                                                                                                                               |            |
|--------------------------|----|---------------------------------------------------------------------------------------------------------------------------------------------------------------|------------|
|                          |    | analyses, results from similar studies, and other relevant evidence                                                                                           |            |
| Generalisability         | 21 | Discuss the generalisability (external validity) of the study results                                                                                         | 16         |
| <b>Other information</b> |    |                                                                                                                                                               |            |
| Funding                  | 22 | Give the source of funding and the role of the funders for the present study and, if applicable, for the original study on which the present article is based | Title page |

---

**Section S2: inclusion and exclusion criteria of study population**

During the process of analyzing the impact of blood pressure control on the severity of aSAH (step 1 analysis), the study population was adult patients with aSAH registered in the database. The inclusion criteria were as follows: 1) Adult patients ( $\geq$  18 years old) with SAH registered in this database between 2016 and 2021; 2) The cause of SAH was an intracranial aneurysm rupture and the diagnosis was confirmed using digital subtraction angiography (DSA); 3) The admission attributable to aSAH was within 48h after the disease onset; The exclusion criteria were as follows: 1) The ruptured aneurysm belonged to fusiform aneurysms, traumatic aneurysms, or feeding artery aneurysms to arteriovenous malformations (AVM); 2) The diagnosis of aSAH was indefinite or established only based on CT. During the process of analyzing the effect of preadmission RAAS inhibitors use on the disease severity (step 2 analysis), the **study population** was hypertensive patients with aSAH who had been regularly treated with antihypertensive medications before admission. The inclusion criteria were as follows: 1) aSAH patients who had the presence of premorbid hypertension; 2) Premorbid hypertension had been treated with any antihypertensive medications for at least 3 months before admission. The exclusion criteria were as follows: 1) The diagnosis of hypertension was indefinite or established after admission; 2) Those who did not start antihypertensive medications and /or only received lifestyle interventions.

---

### Section S3 Two clinical grading scales for the stroke severity of aneurysmal subarachnoid hemorrhage (aSAH)

#### 1.1 Hunt-Hess scale

| Grade   | Hunt-Hess scale                                                                                            |
|---------|------------------------------------------------------------------------------------------------------------|
| Grade 1 | Asymptomatic or mild headache and slight nuchal rigidity                                                   |
| Grade 2 | Moderate to severe headache, nuchal rigidity, no focal neurological deficit other than cranial nerve palsy |
| Grade 3 | Confusion, lethargy, or mild focal neurological deficit other than cranial nerve palsy                     |
| Grade 4 | Stupor or moderate to severe hemiparesis                                                                   |
| Grade 5 | Coma, extensor posturing, moribund appearance                                                              |

#### 1.2 World Federation of Neurological Surgeons (WFNS) scale

| Grade   | WFNS scale                                                                |
|---------|---------------------------------------------------------------------------|
| Grade 1 | GCS 15                                                                    |
| Grade 2 | GCS 14–13 without major focal deficit (aphasia or hemiparesis/hemiplegia) |
| Grade 3 | GCS 14–13 with major focal deficit                                        |
| Grade 4 | GCS 12–7 with or without major focal deficit                              |
| Grade 5 | GCS 6–3 with or without major focal deficit                               |

---

## **Section S4: Statistical analysis**

### **S4.1 Sample size considerations**

With variable selection procedures (seeing below), the number of confounders in this study was estimated to be no more than 20 finally. According to the principle of event per variable (EPV), one can assume that ten events (binary outcome) per independent variable are sufficient to estimate the adjusted effect of exposure. For a binary outcome for severe aSAH, like evaluating by the 2 poor clinical grading scales, with an anticipated prevalence of between 15% and 20%, it would result in a sample size of 1000 to 1333 to be sufficient for analysis.

### **S4.2: Multiple imputation for missing data**

To deal with the missing data, a multiple imputation approach as well a sensitivity analysis comparing complete case and multiply imputed analyses was performed according to the guidance for multiple imputation [1].

- 1) There were eight variables that had missing data (diabetes, hyperlipidemia, PKD, ischemic stroke, previous SAH, location and size of intracranial aneurysms, and irregular aneurysm). The proportion of missing data were 0.5%, 1.3%, 7.4%, 0.7%, 0.9%, 13.1%, 22.1%, and 22.3%, respectively;
- 2) Since the proportions of missing data were less than 30% and the reason for missing data was the absence of the entering, the assumption that the missing data were missing at random was made;
- 3) Based on the assumption, a multiple imputation approach was used to account for

---

missing data;

4) A fully conditional specification method was used to impute missing values for variables. We used a predictive mean matching method for scale variables. The imputations were done using SPSS (version 25.0);

5) The variables that were included in the imputation procedure were age, sex, ethnicity, BMI, smoking, drinking, control of hypertension, prescribed antihypertensive medications, number of antihypertensive medications, diabetes, hyperlipidemia, atrial fibrillation, coronary heart diseases, polycystic kidney diseases, genetic diseases, peripheral vascular diseases, ischemic stroke, previous SAH, and number, location, size, and irregularity of intracranial aneurysms. Additionally, the outcome variables, including Hunt-Hess scale and WFNS scale, were also included in the model.

6) Since at least 20 imputed datasets is preferable to reduce sampling variability from the imputation process, 25 imputed datasets were constructed in this study finally.

7) A sensitivity analysis comparing complete data and imputed data was performed (Table 2).



## Section S5 Tables

Table S1 Comparisons of baseline characteristics between hypertensive patients and non-hypertensive patients

| Characteristics                                  | Missing | Hypertensive patients (n=1959) | Non-hypertensive patients (n=2586) |         | P      |
|--------------------------------------------------|---------|--------------------------------|------------------------------------|---------|--------|
| Age (years)                                      | 0       | 59.55±10.47                    | 55.17±11.31                        | 13.356  | <0.001 |
| ≤60 [n(%)]                                       |         | 996(50.8)                      | 1706(66.0)                         | 105.820 | <0.001 |
| >60 [n(%)]                                       |         | 963(49.2)                      | 880(34.0)                          |         |        |
| Sex [n(%)]                                       | 0       |                                |                                    |         |        |
| Male                                             |         | 667(34.0)                      | 1006(38.9)                         | 11.290  | 0.001  |
| Female                                           |         | 1292(66.0)                     | 1580(61.1)                         |         |        |
| Ethnicity [n(%)]                                 | 0       |                                |                                    |         |        |
| Han                                              |         | 1871(95.5)                     | 2500(96.7)                         | 4.119   | 0.042  |
| Others                                           |         | 88(4.5)                        | 86(3.3)                            |         |        |
| BMI (kg/m <sup>2</sup> )                         | 0       |                                |                                    |         |        |
| <24.0 [n(%)]                                     |         | 1030(52.6)                     | 1698(65.7)                         | 79.513  | <0.001 |
| ≥24.0 [n(%)]                                     |         | 929(47.4)                      | 888(34.4)                          |         |        |
| Smoking status [n(%)]                            | 0       |                                |                                    |         |        |
| Never                                            |         | 1597(81.5)                     | 2141(82.8)                         | 2.998   | 0.392  |
| Ever                                             |         | 27(1.4)                        | 36(1.4)                            |         |        |
| Current                                          |         | 296(15.1)                      | 373(14.4)                          |         |        |
| Passive                                          |         | 39(2.0)                        | 36(1.4)                            |         |        |
| Drinking status [n(%)]                           | 0       |                                |                                    |         |        |
| Never                                            |         | 1749(89.3)                     | 2331(90.1)                         | 2.666   | 0.446  |
| Moderate drinking                                |         | 136(6.9)                       | 179(6.9)                           |         |        |
| Heavy drinking                                   |         | 66(3.4)                        | 66(2.6)                            |         |        |
| Drinking but quit                                |         | 8(0.4)                         | 10(0.4)                            |         |        |
| Diabetes [n(%)]                                  | 13      |                                |                                    |         |        |
| No diabetes                                      |         | 1802(92.5)                     | 2556(99.0)                         | 127.790 | <0.001 |
| Diabetes with antihyperglycemic agents           |         | 103(5.3)                       | 22 (0.9)                           |         |        |
| Diabetes without antihyperglycemic agents        |         | 44(2.3)                        | 5(0.2)                             |         |        |
| Polycystic kidney diseases [n(%)]                | 490     | 3(0.2)                         | 3(0.1)                             | 0.081   | 0.775  |
| Atrial fibrillation [n(%)]                       | 0       | 5(0.3)                         | 1(0.0)                             | 3.965   | 0.091  |
| Coronary heart diseases [n(%)]                   | 0       | 99(5.1)                        | 24(0.9)                            | 72.050  | <0.001 |
| Other heart diseases [n(%)]                      | 0       | 69(3.5)                        | 10(0.4)                            | 64.160  | <0.001 |
| Hyperlipidemia [n(%)]                            | 44      |                                |                                    |         |        |
| No hyperlipidemia                                |         | 1901(98.7)                     | 2570(99.8)                         | 20.686  | <0.001 |
| Hyperlipidemia with antihyperlipidemic agents    |         | 10(0.5)                        | 1(0.0)                             |         |        |
| Hyperlipidemia without antihyperlipidemic agents |         | 15(0.8)                        | 4(0.2)                             |         |        |
| Ischemic stroke [n(%)]                           | 208     | 87(4.5)                        | 27(1.1)                            | 48.431  | <0.001 |

|                                                  |      |                 |                 |        |        |
|--------------------------------------------------|------|-----------------|-----------------|--------|--------|
| Previous SAH                                     | 226  | 54(2.8)         | 50(2.1)         | 2.422  | 0.120  |
| Genetic diseases [n(%)]                          | 0    | 16(0.8)         | 10(0.4)         | 3.624  | 0.057  |
| Peripheral vascular diseases [n(%)]              | 0    | 9(0.5)          | 7(0.3)          | 1.132  | 0.287  |
| Preadmission anti-PLT medications [n(%)]         | 0    | 123(6.3)        | 41(1.60)        | 70.587 | <0.001 |
| Preadmission anti-coagulation medications [n(%)] | 0    | 4(0.2)          | 8(0.3)          | 0.468  | 0.494  |
| Location of the ruptured aneurysms [n(%)]        | 659  |                 |                 |        |        |
| ICA                                              |      | 449(26.4)       | 571(26.1)       | 4.327  | 0.115  |
| MCA                                              |      | 282(16.6)       | 314(14.4)       |        |        |
| ACA/PCoA/posterior                               |      | 967(56.9)       | 1303(59.6)      |        |        |
| Size of the ruptured aneurysm(mm)                |      | 5.00[3.80-6.50] | 4.90[3.50-6.40] | 1.171  | 0.242  |
| <5mm [n(%)]                                      |      | 746(49.6)       | 955(50.4)       | 0.241  | 0.623  |
| ≥5mm [n(%)]                                      |      | 758(50.4)       | 938(49.6)       |        |        |
| Number of aneurysms [n(%)]                       | 0    |                 |                 |        |        |
| 1                                                |      | 1658(84.6)      | 2320(89.7)      | 34.623 | <0.001 |
| 2                                                |      | 224(11.4)       | 224(8.7)        |        |        |
| ≥3                                               |      | 77(3.9)         | 42(1.6)         |        |        |
| Irregular aneurysm [n(%)]                        | 1317 | 314(21.4)       | 282(16.0)       | 15.049 | <0.001 |
| Hunt-Hess scale                                  | 0    |                 |                 |        |        |
| 1-3                                              |      | 1668(85.1)      | 2323(89.8)      | 22.851 | <0.001 |
| 4-5                                              |      | 291(14.9)       | 263(10.2)       |        |        |
| WFNS scale                                       | 0    |                 |                 |        |        |
| 1-3                                              |      | 1373(70.1)      | 1988(76.9)      | 26.666 | <0.001 |
| 4-5                                              |      | 586(29.9)       | 598(23.1)       |        |        |

Table S2 Comparisons of baseline characteristics between RAAS inhibitors users and non-RAAS inhibitors users

| Characteristics                           | Missing | Non-RAAS inhibitors users (n=948) | RAAS inhibitors users (n=290) |         | P      |
|-------------------------------------------|---------|-----------------------------------|-------------------------------|---------|--------|
| Age (years)                               | 0       | 60.5±9.8                          | 61.3±10.3                     | 1.263   | 0.207  |
| ≤60 [n(%)]                                |         | 448 (47.3)                        | 130 (44.8)                    | 0.527   | 0.468  |
| >60 [n(%)]                                |         | 500 (52.7)                        | 160 (55.2)                    |         |        |
| Sex [n(%)]                                | 0       |                                   |                               |         |        |
| Male                                      |         | 300 (31.6)                        | 89 (30.7)                     | 0.094   | 0.759  |
| Female                                    |         | 648 (68.4)                        | 201 (69.3)                    |         |        |
| Ethnicity [n(%)]                          | 0       |                                   |                               |         |        |
| Han                                       |         | 913 (96.3)                        | 287 (99.0%)                   | 5.271   | 0.022  |
| Others                                    |         | 35 (3.7)                          | 3 (1.0)                       |         |        |
| BMI (kg/m <sup>2</sup> )                  | 0       | 24.0±3.1                          | 24.4±2.9                      | 1.911   | 0.056  |
| <24.0 [n(%)]                              |         | 492 (51.9)                        | 143 (49.3)                    | 0.596   | 0.440  |
| ≥24.0 [n(%)]                              |         | 456 (48.1)                        | 147 (50.7)                    |         |        |
| Smoking status [n(%)]                     | 0       |                                   |                               |         |        |
| Never                                     |         | 779 (82.2)                        | 239 (82.4)                    | 1.011   | 0.794  |
| Ever                                      |         | 16 (1.7)                          | 4 (1.4)                       |         |        |
| Current                                   |         | 132 (13.9)                        | 38 (13.1)                     |         |        |
| Passive                                   |         | 21 (2.2)                          | 9 (3.1)                       |         |        |
| Drinking status [n(%)]                    | 0       |                                   |                               |         |        |
| Never                                     |         | 848 (89.5)                        | 270 (93.1)                    | 4.059   | 0.235  |
| Moderate drinking                         |         | 70 (7.4)                          | 12 (4.1)                      |         |        |
| Heavy drinking                            |         | 26 (2.7)                          | 7 (2.4)                       |         |        |
| Drinking but quit                         |         | 4 (0.4)                           | 1 (0.3)                       |         |        |
| Control of hypertension [n(%)]            | 0       |                                   |                               |         |        |
| Controlled                                |         | 364 (38.4)                        | 126 (43.4)                    | 20.320  | <0.001 |
| Uncontrolled                              |         | 317 (33.4)                        | 120 (41.4)                    |         |        |
| Unmonitored                               |         | 267 (28.2)                        | 44 (15.2)                     |         |        |
| Number of antihypertensive drugs [n(%)]   | 0       |                                   |                               |         |        |
| 1                                         |         | 846 (89.2)                        | 145 (50.0)                    | 214.104 | <0.001 |
| ≥2                                        |         | 102 (10.8)                        | 145 (50.0)                    |         |        |
| Diabetes [n(%)]                           | 6       |                                   |                               |         |        |
| No diabetes                               |         | 870 (92.3)                        | 262 (90.7)                    | 4.106   | 0.127  |
| Diabetes with antihyperglycemic agents    |         | 60 (6.4)                          | 26 (9)                        |         |        |
| Diabetes without antihyperglycemic agents |         | 13 (1.4)                          | 1 (0.3)                       |         |        |
| Polycystic kidney diseases [n(%)]         | 91      | 1 (0.1)                           | 2 (0.7)                       | 2.949   | 0.148  |
| Atrial fibrillation [n(%)]                | 0       | 4 (0.4)                           | 0 (0.0)                       | 1.228   | 0.579  |
| Coronary heart diseases [n(%)]            | 0       | 56 (5.9)                          | 18 (6.2)                      | 0.035   | 0.851  |
| Other heart diseases [n(%)]               | 0       | 45 (4.7)                          | 13 (4.5)                      | 0.035   | 0.852  |

|                                                  |     |              |              |       |       |
|--------------------------------------------------|-----|--------------|--------------|-------|-------|
| Hyperlipidemia [n(%)]                            | 16  |              |              |       |       |
| No hyperlipidemia                                |     | 919 (98.1)   | 283 (99.3)   | 1.374 | 0.490 |
| Hyperlipidemia with antihyperlipidemic agents    |     | 9 (1.0)      | 1 (0.4)      |       |       |
| Hyperlipidemia without antihyperlipidemic agents |     | 9 (1.0)      | 1 (0.4)      |       |       |
| Ischemic stroke [n(%)]                           | 9   | 44 (4.7)     | 22 (7.8)     | 3.738 | 0.053 |
| Previous SAH                                     | 11  | 30 (3.2)     | 10 (3.5)     | 0.054 | 0.817 |
| Genetic diseases [n(%)]                          | 0   | 5 (0.5)      | 3 (1.0)      | 0.889 | 0.400 |
| Peripheral vascular diseases [n(%)]              | 0   | 4 (0.4)      | 2 (0.7)      | 0.330 | 0.629 |
| Preadmission anti-PLT medications [n(%)]         | 0   | 75 (7.9)     | 38 (13.1)    | 7.217 | 0.007 |
| Preadmission anti-coagulation medications [n(%)] | 0   | 0 (0.0)      | 2 (0.7)      | 5.816 | 0.055 |
| Location of the ruptured aneurysms [n(%)]        | 162 |              |              |       |       |
| ICA                                              |     | 212 (25.8)   | 72 (28.2)    | 0.593 | 0.743 |
| MCA                                              |     | 131 (16.0)   | 40 (15.7)    |       |       |
| ACA/PCoA/posterior                               |     | 478 (58.2)   | 143 (56.1)   |       |       |
| Size of the ruptured aneurysm(mm)                | 273 | 5.0[3.9-6.4] | 4.6[3.6-6.0] | 1.040 | 0.298 |
| <5mm [n(%)]                                      |     | 360 (48.6)   | 117 (52.0)   | 0.775 | 0.379 |
| ≥5mm [n(%)]                                      |     | 380 (51.4)   | 108 (48.0)   |       |       |
| Number of aneurysms [n(%)]                       | 0   |              |              |       |       |
| 1                                                |     | 778 (82.1)   | 253 (87.2)   | 4.274 | 0.118 |
| 2                                                |     | 123 (13.0)   | 27 (9.3)     |       |       |
| ≥3                                               |     | 47 (5)       | 10 (3.4)     |       |       |
| Irregular aneurysm [n(%)]                        | 276 | 158 (21.3)   | 68 (31.1)    | 9.011 | 0.003 |

Table S3 treatment effect of RAAS inhibitors on the stroke severity of aSAH based on varied classifications of the two clinical grading

scales

| Outcomes        | Exposures               | Imputed data       |       | Completed data     |       |
|-----------------|-------------------------|--------------------|-------|--------------------|-------|
|                 |                         | OR                 | P     | OR                 | P     |
| Hunt-Hess scale | Non-RAAS inhibitors use | Reference          |       | Reference          |       |
| 1 vs. 2-5       | RAAS inhibitors use     | 0.714[0.521-0.977] | 0.035 | 0.698[0.510-0.957] | 0.025 |
| 1-2 vs. 3-5     | RAAS inhibitors use     | 0.604[0.409-0.891] | 0.011 | 0.552[0.334-0.911] | 0.020 |
| 1-3 vs. 4-5     | RAAS inhibitors use     | 0.653[0.430-0.992] | 0.046 | 0.558[0.340-0.918] | 0.022 |
| 1-4 vs. 5       | RAAS inhibitors use     | 0.460[0.188-1.123] | 0.088 | 0.610[0.237-1.569] | 0.305 |
| WFNS scale      | Non-RAAS inhibitors use | Reference          |       | Reference          |       |
| 1 vs. 2-5       | RAAS inhibitors use     | 0.786[0.563-1.096] | 0.156 | 0.663[0.437-1.005] | 0.053 |
| 1-2 vs. 3-5     | RAAS inhibitors use     | 0.697[0.506-0.959] | 0.027 | 0.656[0.447-0.965] | 0.032 |
| 1-3 vs. 4-5     | RAAS inhibitors use     | 0.656[0.469-0.918] | 0.014 | 0.587[0.391-0.882] | 0.010 |
| 1-4 vs. 5       | RAAS inhibitors use     | 0.761[0.450-1.288] | 0.309 | 0.713[0.394-1.292] | 0.264 |
